# Supplementary material for: Accuracy and Precision of Noninvasive Blood Pressure in Normo‐, Hyper‐, and Hypotensive Standing and Anesthetized Adult Horses
Source: PubMed Central journal article supplement — J Vet Intern Med. 2016 Apr 5;30(3):866–72. doi: 10.1111/jvim.13928 (PMC4913577; doi:10.1111/jvim.13928), 2016-04-05
Supplement: JVIM-30-866-s001.pdf [file JVIM-30-866-s001.pdf]

| Subject                          | Pre-medication<br>mg/kg                                                                | Induction<br>mg/kg                                         | Maintenance                                                                                       | Surgical<br>procedure                 | Inotropes                                    |
|----------------------------------|----------------------------------------------------------------------------------------|------------------------------------------------------------|---------------------------------------------------------------------------------------------------|---------------------------------------|----------------------------------------------|
| Horse 1: Warmblood<br>19 y       | Medetomidine <sup>a</sup><br>0.005<br>Methadone <sup>b</sup> 0.05                      | Diazepam <sup>c</sup><br>0.05<br>Ketamine <sup>d</sup> 2.5 | Isoflurane <sup>e</sup> in<br>oxygen and air<br>Lidocaine <sup>f</sup> 1.8<br>mg/kg/h CRI         | Explorative<br>laparotomy             | Dobutamine <sup>g</sup><br>0.2<br>mcg/kg/min |
| Horse 2:<br>Warmblood M 2 y      | Acepromazine <sup>h</sup><br>0.03<br>Methadone<br>0.05<br>Romifidine <sup>i</sup> 0.05 | Diazepam<br>0.05<br>Ketamine 2.5                           | Isoflurane in<br>oxygen and air<br>Romifidine 0.05<br>mg/kg/h and<br>lidocaine 1.8<br>mg/kg/h CRI | Castration and<br>sarcoïd<br>excision | Dobutamine<br>0.3<br>mcg/kg/min              |
| Horse 3: Warmblood<br>M<br>1.5 y | Acepromazine<br>0.03<br>Methadone 0.05<br>Romifidine 0.04                              | Diazepam<br>0.05<br>Ketamine 2.5                           | Isoflurane in<br>oxygen and air<br>Lidocaine 1.8<br>mg/kg/h CRI                                   | Hydrocele<br>excision                 | Dobutamine<br>1.4<br>mcg/kg/min              |
| Horse 4: Icelandic MC<br>22 y    | Methadone 0.05<br>Romifidine 0.04                                                      | Diazepam<br>0.05<br>Ketamine 2.5                           | Isoflurane in<br>oxygen and air<br>Lidocaine 1.8<br>mg/kg/h CRI<br>and ketamine<br>0.6 mg/kg/h    | Tarsal<br>bursoscopy                  | Dobutamine<br>0.5<br>mcg/kg/min              |
| Horse 5: Warmblood F<br>15 y     | Methadone 0.05<br>Romifidine 0.04                                                      | Diazepam<br>0.05<br>Ketamine 2.5                           | Isoflurane in<br>oxygen and air<br>Lidocaine 1.8<br>mg/kg/h CRI                                   | Loop<br>colostomy                     |                                              |
| Horse 6: Warmblood<br>MC<br>13 y | Acepromazine<br>0.03<br>Methadone 0.05<br>Romifidine 0.04                              | Diazepam<br>0.05<br>Ketamine 2.5                           | Isoflurane in<br>oxygen and air<br>Lidocaine 1.8<br>mg/kg/h CRI                                   | Carpal<br>tenoscopy                   | Dobutamine<br>0.5<br>mcg/kg/min              |

|                              |                                                           |                                  |                                                             |                                 |                                 |
|------------------------------|-----------------------------------------------------------|----------------------------------|-------------------------------------------------------------|---------------------------------|---------------------------------|
| Horse 7: Pony MC 4 y         | Acepromazine<br>0.03<br>Methadone 0.05<br>Romifidine 0.04 | Diazepam<br>0.05<br>Ketamine 2.5 | Isoflurane in<br>oxygen and air<br>Romifidine 0.04<br>mg/kg | Post castration<br>fistulectomy | Dobutamine<br>0.7<br>mcg/kg/min |
| Horse 8: Warmblood<br>M 10 y | Acepromazine<br>0.03<br>Methadone 0.05<br>Romifidine 0.04 | Diazepam<br>0.05<br>Ketamine 2.5 | Isoflurane in<br>oxygen and air<br>Romifidine 0.04<br>mg/kg | Stifle<br>arthroscopy           | Dobutamine<br>0.6<br>mcg/kg/min |

**Supplemental Table 1:** Summary of anesthetic protocol and procedures used in the 8 horses in the anesthetized group.

F= female, M= male, MC= male castrated, y= years

<sup>a</sup> 1 mg/ml Domitor, Orion Pharma, Provet AG, Switzerland.

<sup>b</sup> L-methadone/fenpipramide Polamivet ®2.5/0.125 mg/ml, Intervet, Switzerland

<sup>c</sup> Valium®5 mg/ml, La Roche AG, Switzerland

<sup>d</sup> Ketasol ®, 100 mg/ml, Dr. E. Graeub AG, Switzerland

<sup>e</sup> Attane™ Isoflurane ad us. vet., Inhalationsnarkotikum, Provet AG, Switzerland

<sup>f</sup> Lidocaine 2% Lidocaine 20/ml use vet, Streuli Pharma AG Switzerland

<sup>g</sup> Dobutrex 250 mg/5ml, Teva Pharma AG, Basel, Switzerland

<sup>h</sup> Prequillan ®10 mg/ml Arovet AG, Switzerland

<sup>i</sup> Sedivet ® 10 mg/ml, Boehringer Ingelheim, Switzerland .
