# Supplementary material for: Accuracy and Precision of Noninvasive Blood Pressure in Normo‐, Hyper‐, and Hypotensive Standing and Anesthetized Adult Horses
Source: PubMed Central journal article supplement — J Vet Intern Med. 2016 Apr 5;30(3):866–72. doi: 10.1111/jvim.13928 (PMC4913577; doi:10.1111/jvim.13928), 2016-04-05
Supplement: JVIM-30-866-s002.pdf [file JVIM-30-866-s002.pdf]

| Study            | F/A         | GA/CON                                              | IBP                      | NIBP                                             | BW: TG                               | COR  | Normo/Hypo/ Hypertension BP range (mmHg)          | Bias (mmHg)                    | Limits of agreement (mmHg) | R    |             |
|------------------|-------------|-----------------------------------------------------|--------------------------|--------------------------------------------------|--------------------------------------|------|---------------------------------------------------|--------------------------------|----------------------------|------|-------------|
| Branson et al.   | A           | GA, lateral and dorsal recumbence                   | Facial artery            | Coccygeal artery<br>Vet/BP 6000                  | 0.4-0.5                              | 0.74 | Normotension                                      | <b>SAP:</b> 18                 | -12,49                     | 0.84 |             |
|                  |             |                                                     |                          |                                                  |                                      |      |                                                   | <b>DAP:</b> 9                  | -7, 26                     | 0.92 |             |
|                  |             |                                                     |                          |                                                  |                                      |      |                                                   | <b>MAP:</b> 11                 | -8, 30                     | 0.93 |             |
| Giguere et al.   | F           | GA, lateral recumbence                              | Metatarsal artery        | Coccygeal+<br>Cardell9402 (Car)<br>Dinamap (Din) | 0.36-0.9<br>(0.52±0.13)              | NU   | Normo/Hypotension:<br>MAP range:23-95 mmHg        | <b>Din coccygeal MAP:</b> 4.5  | -12.7, 21.2                | NR   |             |
|                  |             |                                                     |                          |                                                  |                                      |      |                                                   | <b>Car coccygeal MAP:</b> -0.5 | -17.7, 16.7                |      |             |
| Nout et al.      | F           | - GA lateral recumbence<br>- CON lateral recumbence | Metatarsal artery        | Coccygeal artery<br>ProPaq Encore 206 EL         | 0.36- 0.52                           | NU   | GA Normo/Hypotension:<br>MAP Range: 35-119 mmHg   | <b>SAP:</b> 8.0                | -18.8, 34.8                | NR   |             |
|                  |             |                                                     |                          |                                                  |                                      |      |                                                   | <b>DAP:</b> -1.3               | -11.2, 8.7                 |      |             |
|                  |             |                                                     |                          |                                                  |                                      |      |                                                   | <b>MAP:</b> -1.1               | -9.4, 7.2                  |      |             |
|                  |             |                                                     |                          |                                                  |                                      |      | CONS Normo/Hypotension:<br>MAP range: 59-113 mmHg |                                | <b>SAP:</b> 15.0           |      | -17.6, 47.5 |
|                  |             |                                                     |                          |                                                  |                                      |      | <b>DAP:</b> -0.4                                  | -17.9, 17.1                    |                            |      |             |
| <b>MAP:</b> -0.5 | -17.2, 16.1 |                                                     |                          |                                                  |                                      |      |                                                   |                                |                            |      |             |
| Olsen et al.     | A           | CON Standing                                        | Facial artery            | Coccygeal artery<br>Datex Ohmeda                 | manufactures<br>description          | 0.7  | Normotension                                      | <b>SAP:</b> -1.5               | -19.3, 16.3                | NR   |             |
|                  |             |                                                     |                          |                                                  |                                      |      |                                                   | <b>DAP:</b> 0.05               | 15.9, 16.0                 |      |             |
|                  |             |                                                     |                          |                                                  |                                      |      |                                                   | <b>MAP:</b> -0.3               | -18.5, 19.1                |      |             |
| Tearney et al.   | A           | GA, lateral recumbence                              | Transverse facial artery | Coccygeal artery+,<br>Cardell 9401               | 0.25 ±0.02<br>0.42±0.03<br>0.50±0,03 | NU   | Normotension                                      | <b>MAP:</b> -0.39              |                            | NR   |             |
|                  |             |                                                     |                          |                                                  |                                      |      |                                                   | <b>MAP:</b> 9.91               |                            |      |             |
|                  |             |                                                     |                          |                                                  |                                      |      |                                                   | <b>MAP:</b> 8.46               |                            |      |             |
| Tümsmeyer et al. | A           | GA: dorsal recumbence                               | Transverse Facial artery | Coccygeal artery<br>HDO (Memo diagnostic Equine) | 0.4                                  | 0.74 | Normotension (MAP= 60-110 mmHg)<br>*              | <b>SAP:</b> 0.1                | -38,38                     | NR   |             |
|                  |             |                                                     |                          |                                                  |                                      |      |                                                   | <b>DAP:</b> 4.7                | -26, 35                    |      |             |
|                  |             |                                                     |                          |                                                  |                                      |      |                                                   | <b>MAP:</b> 0.5                | -27, 28                    |      |             |
| Zacche et al.    | A           | CON Standing                                        | Facial artery            | Coccygeal artery<br>Dixtal 2710 (Dix)            | 0.4                                  | NR   | Normotension                                      | <b>SAP:</b> 23.28              |                            | 0.61 |             |
|                  |             |                                                     |                          | PetMAP (Pet)                                     |                                      |      |                                                   |                                | <b>SAP:</b> 31.95          |      | 0.60        |

**Supplemental Table 2:** Comparison of recent studies evaluating oscillometric blood pressure monitors

F=Foal, A=Adult, GA = general anesthesia, CON= Conscious, IBP= location of catheter placement for invasive blood pressure measurement, NIBP= Location and device used for non-invasive blood pressure measurement, BW:TW= Bladder width to tail width ratio, COR= correction factor (mmHg/cm), NU= not used, NR= not reported, SAP= Systolic arterial pressure, DAP= diastolic arterial pressure, MAP= Mean arterial pressure, HDO= high definition oscillometry. + In this study other locations also tested. \*In this study hypo and hypertension were also tested.
